# Supplementary material
Source: PubMed Central journal article supplement (PMC6645311)
Supplement: ao8b02041_si_001.pdf [file ao8b02041_si_001.pdf]

## Supporting Information

# Self-Assembled Polyvinyl Alcohol-Tannic Acid Hydrogels with Diverse Microstructures and Good Mechanical Properties

*Ya-Nan Chen<sup>†</sup>, Chen Jiao<sup>†</sup>, Yaxin Zhao<sup>†</sup>, Jianan Zhang<sup>†</sup> and Huiliang Wang\*<sup>†</sup>*

<sup>†</sup>Beijing Key Laboratory of Energy Conversion and Storage Materials, College of Chemistry, Beijing Normal University, Beijing, 100875, P. R. China

Email: wanghl@bnu.edu.cn

## Supporting Figures

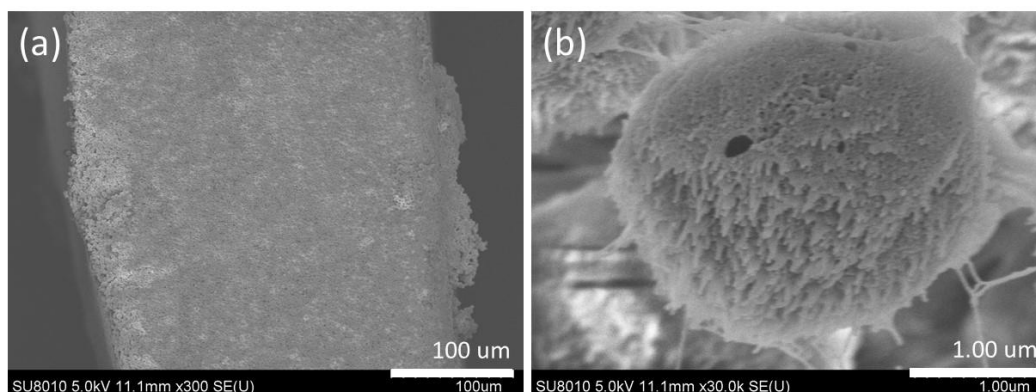

**Figure S1.** SEM images of the PVA-TA hydrogel obtained at a PVA-TA concentration of 0.5 wt% at 25°C. Scale bars: 100  $\mu\text{m}$  (a), 1  $\mu\text{m}$  (b).

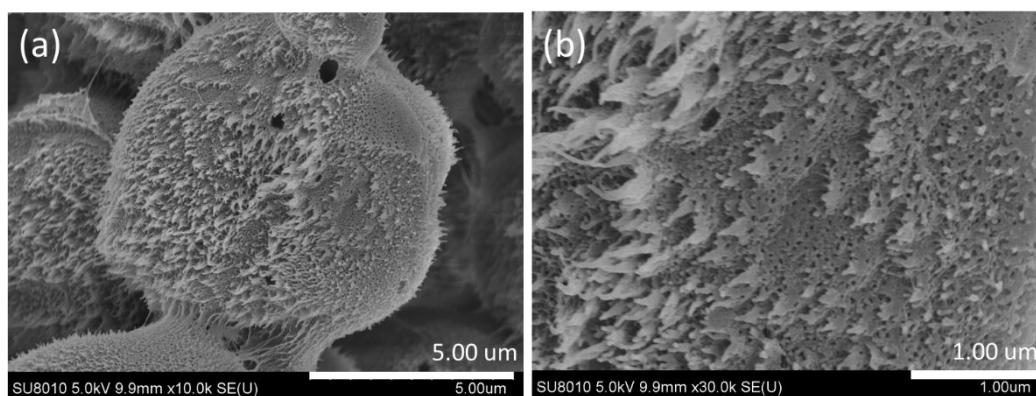

**Figure S2.** SEM images of the PVA-TA hydrogels obtained at a PVA-TA concentration of 1.0 wt%. Scale bars: 5  $\mu\text{m}$  (a), 1  $\mu\text{m}$  (b).

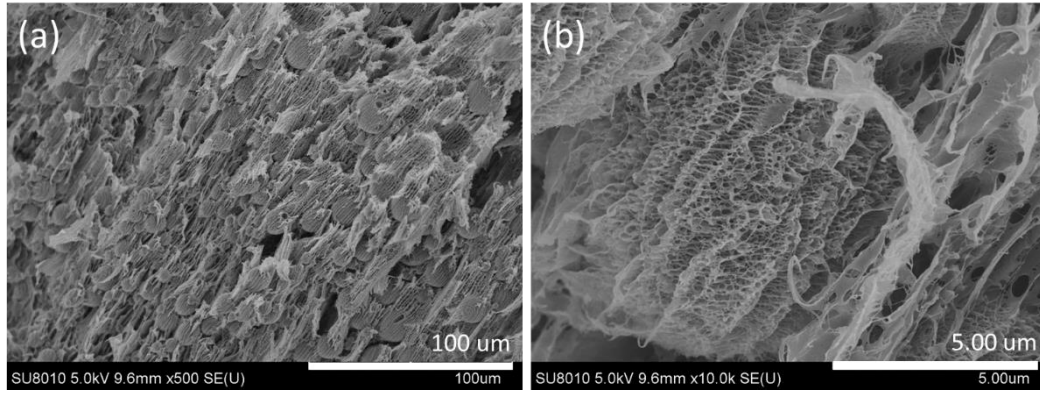

**Figure S3.** SEM images of the upper layer of the PVA-TA hydrogels obtained at a PVA-TA concentration of 4.0 wt%. Scale bars: 100 μm (a), 5 μm (b).

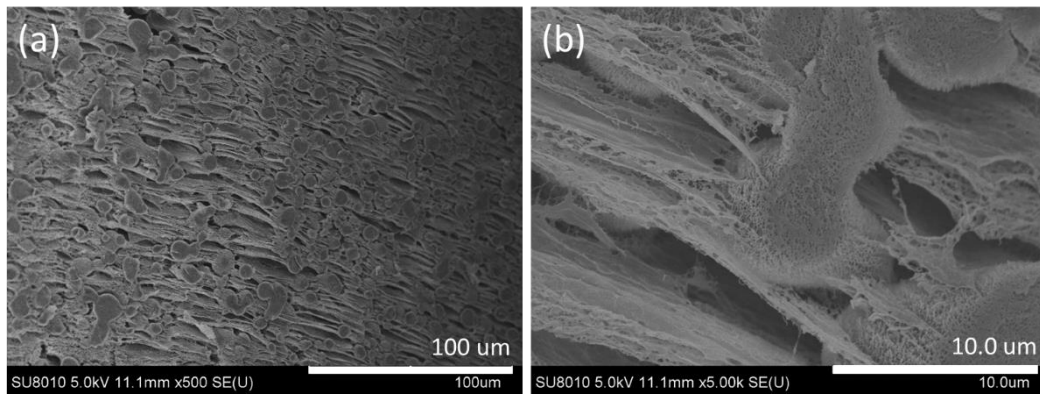

**Figure S4.** SEM images of the PVA-TA hydrogels prepared at 1.0 wt% PVA-TA concentration with the addition of  $1 \times 10^{-3}$  M SDBS. Scale bars: 100 μm (a), 10 μm (b).
